# Supplementary material
Source: PubMed Central journal article supplement (PMC2757229)
Supplement: supp_M109.018564_jbc.M109.018564-1.pdf [file supp_M109.018564_jbc.M109.018564-1.pdf]

## Supplemental Materials

**Table S1. Strains and plasmids.**

| Strain or plasmid | Description                                                                                      | Reference  |
|-------------------|--------------------------------------------------------------------------------------------------|------------|
| <b>Strains</b>    |                                                                                                  |            |
| M145              | Wild type <i>S. coelicolor</i> A3(2)                                                             | (1)        |
| GSA3              | M145 $\Delta$ <i>ssgA</i>                                                                        | (2)        |
| GSB1              | M145 $\Delta$ <i>ssgB</i>                                                                        | (3)        |
| <b>Plasmids</b>   |                                                                                                  |            |
| pHJL401           | <i>Streptomyces/E. coli</i> shuttle vector (5-10 and around 100 copies per genome, respectively) | (4)        |
| pGWS271           | pHJL401 harboring <i>ssgB</i> (Stro) and its upstream region                                     | This study |
| pGWS294           | pHJL401 harboring <i>ssgB</i> (Sery) and its upstream region                                     | This study |
| pGWS295           | pHJL401 harboring SACE5535 and its upstream region                                               | This study |
| pGWS299           | pHJL401 harboring <i>ssgB</i> (Krad) fused to the <i>S. coelicolor ssgB</i> promoter             | This study |
| pGWS554           | pHJL401 harboring <i>ssgB</i> (Tfus) fused to the <i>S. coelicolor ssgB</i> promoter             | This study |
| pGWS555           | pHJL401 harboring <i>ssgB</i> (Fran) fused to the <i>S. coelicolor ssgB</i> promoter             | This study |
| pGWS556           | pHJL401 harboring Francci3_3418 fused to the <i>S. coelicolor ssgB</i> promoter                  | This study |

**Table S2.** Oligonucleotides

| <b>Primer name</b> | <b>DNA sequence (5' to 3')*</b>          | <b>Location 5' end<sup>+</sup></b> |
|--------------------|------------------------------------------|------------------------------------|
| Sery_BF            | <i>CTGGAATTC</i> CGCGAGCGGGAATTCGATCT    | -399                               |
| Sery_BR            | CTGAAGCTT <i>CGGCTGGGCTCTTGATCTC</i>     | +563                               |
| Sery_2F            | <i>CTGGAATTC</i> GCAACCTTCTGAACGCCGTG    | -408                               |
| Sery_2R            | CTGAAGCTT <i>CGATTCCAGTGCCCGGGAAG</i>    | +496                               |
| SalTr_BF           | <i>CTGGAATTC</i> TCCACTGAGGATCGCTCCGTCAC | -296                               |
| SalTr_BR           | CTGAAGCTT <i>CATCACCACCCACGGCTGAGC</i>   | +569                               |

\* Underlined sequences indicate non-homologues sequence added to create restriction sites (in italics) at the ends of the PCR fragments.

<sup>+</sup> Relative to the first nucleotide of the respective gene

**Table S3.** *ssgB* genes used in the genetic locus comparison (see Figure 1) .

| <b>Genome tag or contig number</b> | <b>Organism</b>                    | <b>GeneID</b> | <b>Name used in this work</b> |
|------------------------------------|------------------------------------|---------------|-------------------------------|
| SCO1541                            | <i>Streptomyces coelicolor</i>     | 1096967       |                               |
| SAV6810                            | <i>Streptomyces avermitilis</i>    | 1217088       |                               |
| scab0975f02.p1k                    | <i>Streptomyces scabies</i>        | -             |                               |
| SGR5997                            | <i>Streptomyces griseus</i>        | -             |                               |
| FRAAL2127                          | <i>Frankia alni</i> ACN14a         | 4235729       |                               |
| Francci3_1359                      | <i>Frankia</i> sp. CcI3            | 3904606       | <i>ssgB</i> (Fran)            |
| Francci3_3418*                     | <i>Frankia</i> sp. CcI3            | 3905658       | Francci3_3418                 |
| Franean1_5158                      | <i>Frankia</i> sp. EAN1pec         | 5675752       |                               |
| SACE_1961                          | <i>Saccharopolyspora erythraea</i> | 4941816       | <i>ssgB</i> (Sery)            |
| SACE_5535*                         | <i>Saccharopolyspora erythraea</i> | 4945278       | SACE5535                      |
| Acel_1369                          | <i>Acidothermus cellulolyticus</i> | 4486262       |                               |
| Krad_3069                          | <i>Kineococcus radiotolerans</i>   | 5336467       | <i>ssgB</i> (Krad)            |
| Noca_2368                          | <i>Nocardioides</i>                | 4595986       |                               |
| Tfu_2111                           | <i>Thermobifida fusca</i>          | 3581046       | <i>ssgB</i> (Tfus)            |
| Strop_1600                         | <i>Salinispora tropica</i>         | 5058058       | <i>ssgB</i> (Stro)            |
| Sare_1560                          | <i>Salinispora arenicola</i>       | 5704920       |                               |

\* The locus of this gene does not resemble that of *ssgB* gene orthologues (not shown in **Fig. 1**)

**Table S4. Viable spore counts of transformants.** For explanation of viable counts, see Figure 3 and Experimental Procedures. Percentages of viable spores are given, with the total number of spores counted per transformant between brackets.

| <b>Strain</b> | <b>Plasmid</b> | <b>Plasmid-encoded SALP</b> | <b>Viable spore count #</b> |
|---------------|----------------|-----------------------------|-----------------------------|
| M145          | pHJL401        | none                        | 100% (319)                  |
| GSB1          | pHJL401        | none                        | no spores                   |
| GSB1          | pGWS271        | <i>ssgB</i> (Stro)          | 65% (152)                   |
| GSB1          | pGWS294        | <i>ssgB</i> (Sery)          | 80% (311)                   |
| GSB1          | pGWS295        | SACE5535                    | no spores                   |
| GSB1          | pGWS299        | <i>ssgB</i> (Krad)          | 87% (150)                   |
| GSB1          | pGWS554        | <i>ssgB</i> (Tfus)          | 93% (224)                   |
| GSB1          | pGWS555        | <i>ssgB</i> (Fran)          | 99% (149)                   |
| GSB1          | pGWS556        | Francci3_3418               | 96% (70)                    |

## Fig. S1

Nucleotide sequences of *ssgB* from *S. coelicolor* and of the actinomycete *ssg* genes described in the paper. *Sac. erythraea ssgB* (SACE\_1961) and SACE\_5535 and *Sal. tropica ssgB* (Strop\_1600) were produced by PCR amplification from genomic DNA, using primers (Table S2 in the paper) designed against the underlined sequences. *Frankia* sp. cci3 *ssgB* (Francci3\_1359) and Francci3\_3418, *K. radiotolerans ssgB* (Krad\_3069), and *T. fusca ssgB* (Tfu\_2111) were produced by gene synthesis, whereby the upstream region of *S. coelicolor ssgB* (italicized) was fused to the coding sequences to ensure correct developmental transcription (in terms of timing and expression level) of the actinomycete ORFs. Highlighted triplets: green, most likely translational start site; red, translational stop codon; cyan, originally predicted translational start of *S. coelicolor ssgB*, but less likely due to downstream located promoter (Kormanec and Sevchikova, 2002). All genes were cloned into the low-copy number vector pHJL401 making use of the engineered *EcoRI* (GAATTC; upstream) and *HindIII* (AAGCTT; downstream) restriction sites, except SACE\_1961 (*EcoRI-BamHI* (GGATCC)). Considering the uncertainty regarding the start site of *ssgB* from *Kineococcus radiotolerans* [SsgB(Krad)], the annotated (long) ORF was used.

### >ssgB(Scoe)

[SCO1541; nt positions 1650212-1650830]

*GAATTCCTGTCACCGAATGGGCGTACGACTCGAACGGTCCATCGGCCGGAAGAGTTACG*  
*TAAACACACGCAAACACTCAGAGGGGTTTACAACGGCACCGTAG***GTG***GCATGTCGATT*  
*CGCCGACGTGCGAATCCCCGAGCGCACACTGAGCGAAAGGCCCTGGCGCTT***ATG***AACACC*  
*ACGGTCAGCTGCGAGCTGCACCTGCGCCTCGTTGTGTGTCGAGCGAGTCTCCCTGCCTGTC*  
*CCCGCAGGCCTGCGGTACGACACGGCCGACCCCTACGCCGTGCACGCCACCTTCCACACC*  
*GGAGCCGAGGAGACCGTCGAGTGGGTCTTCGCCCGGACCTGCTCGCCGAAGGTCTCCAC*  
*CGTCCCACCGGCACCGGCGACGTCCGTGTCTGGCCGTCCCGCAGTCACGGCCAGGGCGTC*  
*GTGTGCATCGCTCTCAGTCCCCGGAGGGCGAGGCACTGCTCGAGGCCCGGCGCGGGCC*  
*CTGGAGTCTTCTGAAGCGCACAGACGCCCGGTGCCCCCGGCACGGAACACCGGCAC*  
*TTCGATCTCGATCAGGAGCTCTCGCACATCTGGCGGAAAGC***TAG***GGCGGGCCTCGCGT*  
*GAAGCCGCCCGTCGCCGTCGACTCGAAGCTT*

### Predicted gene product (137 aa):

MNTTVSCELHLRLVVSSESLPVPAGLRYDTADPYAVHATFHGTAEETVEWVFARDLLAE  
GLHRPTGTGDVRVWPSRSHGQGVVCIALLSPEGEALLEAPARALESFLLKRTDAAVPPGTE  
HRHFDLDQELSHILAE

### >SsgB(Tfus)

[Tfu\_2111; gene coordinates 2471763-2472179]

*GAATTCCTGTCACCGAATGGGCGTACGACTCGAACGGTCCATCGGCCGGAAGAGTTACG*  
*TAAACACACGCAAACACTCAGAGGGGTTTACAACGGCACCGTAG***GTG***GCATGTCGATT*  
*CGCCGACGTGCGAATCCCCGAGCGCACACTGAGCGAAAGGCCCTGGCGCTT***ATG***AGCAGC*  
*AGCGGCACCTCTATCACCTGCGAAGTCGGTTTGCAGCTGATCGTTCCTGATCGTGCCCC*  
*GTGCCCCTGGTGGCCCGTCTCGACTACTCCGTGGACGACCCTTACGCCATCCGGGCGGCC*  
*TTCCATGTGGGCGACGACGAACCCGTGGAGTGGATCTTCGCTCGTGAGCTGCTGACCGTG*  
*GGCATCATCCGCGAAACAGGCGAAGGCGACGTGCGCATCTGGCCCTCGCAGGACGGGAAG*  
*GAGCGCATGGTCAACATTGCCCTCTCCTCACCTTTCGGCCAGGCGCGGTTCCACGCGCAG*  
*GTGGCACCCCTCTCGGAGTTCCTGCACCGCACCTACGAGCTGGTTCCTGCCGGGACAGGAG*  
*AGCGACTACATCGACATCGACGCTGAAATCGCTGAGCACCTCAGC***TAG***TCTCACCGGGT*  
*CGGGACCGCTGTCCAGATCTAAGCTT*

### Predicted gene product (138 aa):

MSSSGTSITCEVGLQLIVPDRAPVPLVARLDYSVDDPYAIRAAFHVGDDEPVWIFAREL  
LTVGHIRETGEGDVRIWPSQDGKERMVNIALSSPFGQARFHAQVAPLSEFLHRTYELVPA  
GQESDYIDIDAEIAEHL

**>ssgB(Fran)**

[FranCci3\_1359; gene coordinates 1632539-1632970 (reverse strand)]

GAATTCCTGTACCCGGAATGGGCGTACGACTCGAACGGTCCATCGGCCGGAAGAGTTACG  
TAAACACACGCAAACACTCAGAGGGGTTTACAACGGCACCCGTAGGTGGCATGTGCGATT  
CGCCGACGTGCGAATCCCCGAGCGCACACTGAGCGAAAGGCCCTGGCGCTTATGAACACC  
ACGGTCAGCTGCGAACTCGCCCTCCGCCTTGTCTGTTCCCGGCGGGGCGCCCGTGCCTGGT  
GCCGCCACCGTCCGGTACGAGCCGGCCGATCCGTACGCGATCAGCATCGGCTTCCGCACC  
GGTGCGGACGAGGTCGTGGAGTGGACATTCGCGCGCCAGCTCCTCAGCGACGGTGTGCGC  
CGACCTGCCGGGGATGGCGACGTGCAGGTGTGGCCTGCCGCCAGTCCGGGGGACGGATC  
GTCTGCCTGTCCCTGTCCAGCCCGTCCGGGCATGCACTGTTTCGAGATGCCGCGGTCGAG  
GTGTGGCCTTCTACGGCGGACGTATTACGCCGTCCCCCTCGGCGGGGAGAGCGACATC  
ATCGATCTTGACCCGAACTCGCCCTCCTCATCTGGGCGGCCCCGAGCGGTGATCTCAC  
CGGGGTCGGGACCGCTGTCCAGATCAAGCTT

Predicted gene product (143 aa):

MTIRHDSITAELALRLVVPGGAPVPVAATVRYEPADPYAISIGFRTGADEVVEWTFARQL  
LSDGVRRPAGDGDVQVWPAAQSGGRIVCLSLSSPSGHALFEMPRSEVLAFRRRTYSAVPL  
GGESDIIDLDAELALLIWGGPER

**>FranCcI3\_3418**

[FranCci3\_3418; gene coordinates 4062259-4062696 (reverse strand)]

GAATTCCTGTACCCGGAATGGGCGTACGACTCGAACGGTCCATCGGCCGGAAGAGTTACG  
TAAACACACGCAAACACTCAGAGGGGTTTACAACGGCACCCGTAGGTGGCATGTGCGATT  
CGCCGACGTGCGAATCCCCGAGCGCACACTGAGCGAAAGGCCCTGGCGCTTATGCTCCGT  
CACAGCTCGACGCCCGCGCATGTCTGGCGCGCATCTATCCGTTGACTACGTACGGAG  
GAGGGGGAGCGAGAGGGGATCCCCGGCACACTCCGTTATGACCCGGTGTATCCCTTCGCC  
GTTGAGTTGATCTACGTCCCGGTGAAGAGGCCATCACCTGGATCTTCGCCCAGCGCGTG  
CTGGCCGAAGGGATCGAGGTTCCCGCCGGGACCGGCGACGTGCGCATCCGGCCGACGAGA  
TCCAAGGGGCAGACGGTGTACGGTGTCCCTGTCCAGCCCGTCCGGGGCATGCCGATCTC  
GAGCTGGCGAAGTCAAGGTCACCGCCTTCTCGCCGACTGCCACGGACAGGTTCCAGCG  
GGGCGGGAGAGCAACGGCATCGACTGGAACAACGAACCTCACATGTCTGCGCACTCGG  
AACACCTGATCTCACCGGGGTCCGGACCGCTGTCCAGATCTAAGCTT

Predicted gene product (145 aa):

MLRHSSTPAHVVARLDLSVDYVTEEGEREAIPTGLRYDPADPFVELILRPGEEAITWIFA  
RALLAEGIEVPAGTGDVIRPTRSKGQTVITVSLSSPSGHADLELAKSKVTAFLADCHGQ  
VPAGRESNGIDWNNELHMLLRTRNT

**>ssgB(KRad)**

[Krad\_3069; gene coordinates 3147086-3147583]

GAATTCCTGTACCCGGAATGGGCGTACGACTCGAACGGTCCATCGGCCGGAAGAGTTACG  
TAAACACACGCAAACACTCAGAGGGGTTTACAACGGCACCCGTAGGTGGCATGTGCGATT  
CGCCGACGTGCGAATCCCCGAGCGCACACTGAGCGAAAGGCCCTGGCGCTTATGGAAAC  
TCATGGACACGGTCTGCTGGAGCCCGTACGCGCCATGAGCACACGGAGGTCGACGTGCCT  
GCACTGCCGCACCGCAAGACCGAGGTCGACGTGACGTGTCCTTGGCGCTCCGGACCACC  
AGCGGTCCGGGACTCCCCGTCCCCGCCAGCCTCCACTACGGAGCTGACGACCCGTACGCC  
ATCCACGCGGTCTTCCGCGGCGGCGACACGGACGTGGAGTGGGTCTTCGCCCGGGACCTG  
TTGAGGGAGGGGCTGTCCGCACCCGCGCGCGGCGACGTGCAGGTGCAGCCCTGCTCC  
GACTCCCCCGACGGCCGTCCCCGGGTCCTGCTGCGCCTGTCTCCCGGACGGCAACCGG

GAGCTCGAAGCGGACGAGTCCGACGTGCGGCGCTTCTGCGTTCGCGCCGACGCCCTCGTC  
CCCCCGGCCGCGAGACCCGCCACCTGGACCTCGACGAGCTCATCGCCCGTCTCGTCTCC  
**TGA**TCTCACCAGGGGTGCGGACCGCTGTCCAGATCTAAGCTT

Predicted gene product (163 aa):

VGNSWTRSLEPVSGHEHTEVDVDPALPHRKTEVDVDSLRLRTTSGPGLPVPASLHYGA  
DDPYAIHAVFRGGDTDVEWVFARDLLREGLSAPAGAGDVQVQPCSDSPDGRPRVLLRLSS  
PDGNAELEADESDVRRFLRRADALVPPGRETRHLDLDELIALRLVS

>SsgB(Sery)

[SACE\_1961; gene coordinates 2141781- 2142206]

GAATTCGATCTCGCCGGGCGGCGTGTGCCGACGAACGCGATGGGTTCGACCCGGGCGCGA  
CCGCGCAGGCGGTGGCGTGTGGAACTGCCAGTGGCCGATCGCCGGGTGGCGACGGGGCG  
CGGGCTCCGGTCGGCGTCCGCCGAGGTGCGGACGGCCATTTCGGCGCTAGGGGATCGGC  
AGGGCTTGGCGGGGGCGGACCCGTTGCCGGGTCCGGTTCGAAAAGAGCGGGTGAACA  
CGCTGCGCATTGCCTTGGTTGCCAGCGAATTGGGGCCTGCCCCGTACGGGTGATCTATC  
CGGAGTTGCGAGCCATCGGGCCAGGAAGGCGTCACAACTGTGTTGCTCGGTTCGATAAG  
CGGACCGGAAGGTAGTAGGAAGGCGAGGACA**ATGCGTAACGATCACGTGACACTCCGTT**  
AACGGCGGTGTTTCGATCTGCTGGCCCCGACAGCGCCGGCCGTGCCGGTGCAGGTTCGAGCT  
GCGCTACGACACTCGTGACCCCTACGCCGTGGTGGCCGCGTTCGCCACCGGCCGCGCGGG  
GTGGGTGCAATGGGTCTTCGCGCGCGATCTGCTGGCCGACGGCCTCATCGCGCACGCGGG  
CGTGGGCGATGTGACCATCCGCCCGCGGTGACGACCCCGAGGTCGTGGTTCGAGCT  
GAGTCCCCCTCCGGGCACGCCGTGTTTCGAGGCTTCGGCGCAGGAGCTGGCCGACTTCT  
GGACCGCACCTACGACGTGGTGGTCCCCGGCAACGAGAACCTGTGGGTCAACGTCGACGA  
CGCGCTACCCGCCTGTTGCCGCACGACCTGTCC**TGA**CCGGCCCGCACCGGGTCTGGCCA  
GGCCGAACGCTGCTCGGAACCGGGTAGCGGGACCCCGGTTTCGATCGCCGTTGGCGGCGTG  
GTCTAAAGTTTCTCGTGCAACGCGGGCGGACGGCCGGAGATCAAGAGCCCAGCCGGGCTCG  
GAGATCGAAGTTCGGCAAGCCGCAGGCAGGCGGACGTAGCGCAGCTGGTAGCGCATCACCT  
TGCCAAGGTGAGGGTTCGCGGGTTCGAGTCCCGTCTGCGTCCGCTCTGGATGAGTCAGGTCCAG  
CCCGTTTCGGATTGGATCC

Predicted gene product (141 aa):

MRNDHVTLRSTAVFDLLAPQTPAVPVQVELRYDTRDPYAVVAAFRTGRAGWVEWVFARDL  
LADGLIAHAGVGDVTIRPAVDDPEVVVIELSSPSGHAVFEASAQELADFLDRTYDVVVP  
NENLWVNVDDALTRLLPHDLS

>SACE\_5535

[SACE\_5535; gene coordinates 6233273- 6233695 (reverse strand)]

GAATTCGCAACCTTCTGAACGCCGTGCGCGGGGATCCGACGGGCGCGGCTGGAGCTCCAT  
CGCACTCCGCTCTTCCAAGGCCACCAAGCGCCTCGTGAGCCAAAATCACGCCTCCGTCG  
CCCATTCTGGATATTGACGTTTCGTGGCTGGTTCGATAAACTTGTGCCTTACTCGCGGTTT  
CCCGTCTGCACGGTGAACCACAGGGGACCAAACTGCCCGGTAGGGTGAAGGCCCTTGGTT  
CAGGTGTGCCCTCGGCTCCCGTAACGCCTGTTTCGAAAGGGCACTTCGTGTAACGCGTGT  
CGGGTGGGTGCGCCCGTGTACGTCGGCGGACCTGAAGACTTCGTGAAGAAGATATGGATT  
CGGGGCGTGCATACTCGGAACTCGATACGGAGTCGAGGGAAGAGGAGCACGCGA**ATG**AAG  
AACCACAGGACCGTCTTACCAGCATGGTGTTCAGCTGCTGGCGCCGGCGGGAGCGACC  
GCGCCGGTTCGGCGTGGAGCTGCGGTTTCGAGAGCCGCAACCCGTACGAGGTGTCGCTGGCC  
TTCAGCGCTGGTAGCGGCGGTACGTTGGAGTGGGTGCTCGCCAGGGACCTGCTGGCCGAC  
GGTCTGATGATCGACAGCGGGGAAGGTGACGTGCGGGTGGGGCCCGACGCGAGCGATCCC  
GCGGTGATCGTGGTGTGCTGCTCGCCGAGCGGGCAGGCCACCTTCGAAGCCGACGCT  
GAGCAGTTGGTTCGACTTTTGAACCGGACCTACGACGTGGTACCGCCTGGTAAGGAACAC  
CAGTGGATGAGTATCGACGAGGCCCTGGCGCGGATGCTGCCGATGACCTGTAC**TGA**TCG  
CCGCGGGTCCGGCGCCGGATCGCCGGATGTGCCTCGCCGCTAGTCCGGGGCTTCCCGGGC  
ACTGGAATCGAAGCTT

Predicted gene product (140 aa):

MKNHRTVLTSMVFKLLAPAGATAPVGVELRFESRNPYEVSLAFSAGSGGHVEWVLARDLL  
ADGLMIDSGEGDVRVGPDASDPAVIVVSLSSPSGQATFEADAEQLVDLNRITYDVVPPGK  
EHQWMSIDEALARMLPHDLY

**>SsgB(Stro)**

[Strop\_1600; gene coordinates 1821027..1821458 (reverse strand)]

TCCACTGAGGATCGCTCCGTCACTTTTCTCCCCAGTGTGGCGCGCGCCCGTCACTGCG  
ACCGTGGACTGGACGTTACCGGAGTAGTCGACGACTGAAGCACCTGATGCCGATCGGCAC  
CGCGGACGGGCAGAACCGGAAATCCTACAGGAACTTTCACATTCTGGAGGACACTCCGAA  
GACCTTCCCACCACTGGGTGAAGTCAGCGTATGGCGGAGCGTAGCTAGGGGCAGCACCTG  
AGTATGGGAAAAGCGGGACACGCGCGTCCCAGCGGTGCCGGGGGAGAACGTCCATGA  
GTGTCATCCGACCGACGACCGGTAGAGGTCGAGACGTCGCTAAGGCTCGTCGCACCTGACG  
CCACGGCCTTGCCGGTGCAGCGCCAGTCTGCGCTACGACCCCTGCTGACCCGTATGCCGTCC  
ACGTCCTGTTCCATGCGGAATCGGCTGGTGGCGAGGCGGTGAGCTGGTTCGTCGCACGGG  
AACTGCTGGTGACCGGCCTCGATGAGCCGGCCGGCATCGGCGATGTGCGGGTCTGGCCCT  
GGGCCACCCGCGCGGGGACTTCGTCGCCCTGGCGTTGTCGTCCCCAGATGGCAACGCC  
TGTTTGAGGTGCCGCGGAGCGTCTTGGTGCCTTCTGCGGCGGACCTACGTCGTCGTCG  
CGCGCGGCCGGGAGGCCGAGCACCTGGACGTCGACACGGCGGTGAACCGGCTGCTCGCCG  
GACGCTGATCGAAGGGGCTGGAGTCTGGTACTGGTCAGCCGGGGCCGCGCGGAGCTG  
CCGAGTCCGCGGACCCCGGCTACCCCGGTGCGTACGCGAAGCGGTGCGCCGCGGATGCG  
CCCGGCTCAGCCGTGGGTGGTGAAGCTT

Predicted gene product (143 aa):

MSVIRPTTVEVETSLRLVAPDATALPVRASLRYPADPYAVHVLFAESAGGEAVSWSFA  
RELLVTGLDEPAGIGDVRVWPWATPRGDFVALALSSPDGNALFEVPRSVLVRFLRRTYVV  
VARGREAHLVDVDTAVNRLLAGR



**Fig. S2. Fluorescence micrographs showing localization of SsgB-GFP to emerging sporulation septa in sporogenic aerial hyphae of *S. coelicolor* FM145.** Left: fluorescence micrograph showing ladders of SsgB-GFP; right: light micrograph of the same image; middle: overlay of left and right images. Note that the prominent aerial hypha containing the SsgB-GFP foci shows constrictions precisely at the sites to which SsgB-GFP localizes (see right panel). FM145 is a low fluorescent variant of *S. coelicolor* M145 (5).

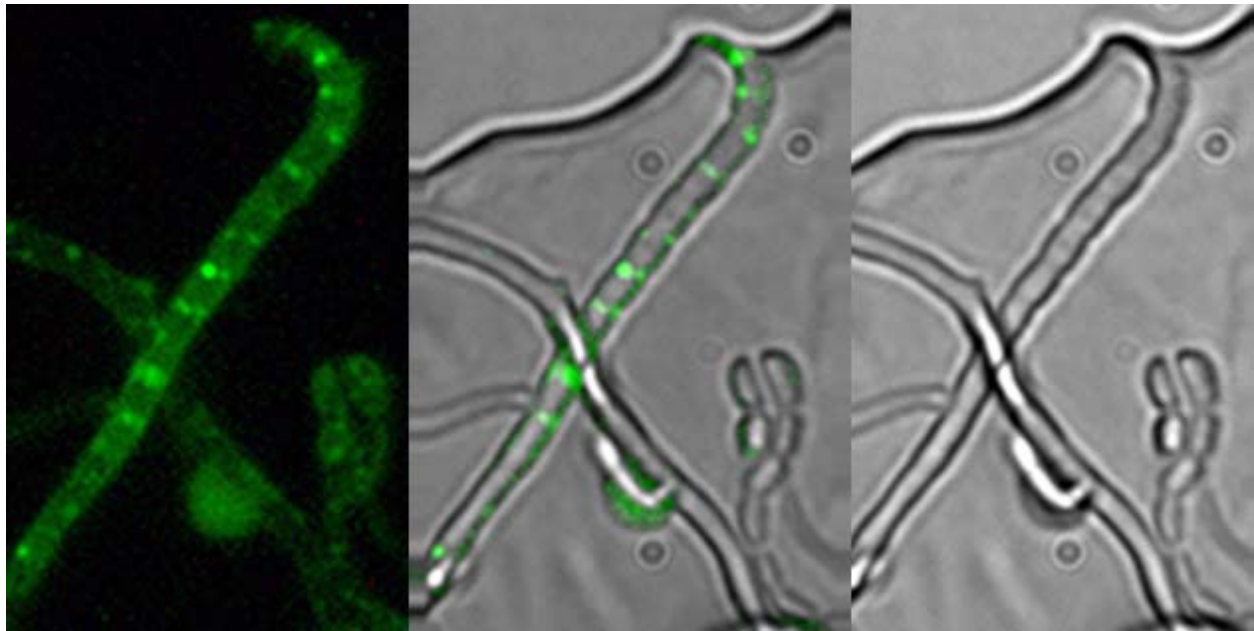

### Supplemental References

1. Kieser, T., Bibb, M. J., Buttner, M. J., Chater, K. F., and Hopwood, D. A. (2000) *Practical Streptomyces genetics*, The John Innes Foundation, Norwich, United Kingdom
2. van Wezel, G. P., van der Meulen, J., Kawamoto, S., Luiten, R. G. M., Koerten, H. K., and Kraal, B. (2000) *J Bacteriol* **182**, 5653-5662
3. Keijser, B. J., Noens, E. E., Kraal, B., Koerten, H. K., and van Wezel, G. P. (2003) *FEMS Microbiol Lett* **225**, 59-67
4. Larson, J. L., and Hershberger, C. L. (1986) *Plasmid* **15**, 199-209
5. Willemse, J., and van Wezel, G. P. (2009) *PLoS ONE* **4**, e4242
